# Supplementary material for: Risk Factors for Influenza-Induced Exacerbations and Mortality in Non-Cystic Fibrosis Bronchiectasis
Source: MDPI journal article supplement (doi:10.3390/v15020537), 2023-02-14
Supplement: s1 [file s1]

## Supplementary Materials

**Table S1.** Baseline characteristics of bronchiectasis patients with influenza infection (PCR or rapid antigen test).

|                           | All<br>n = 231 | Clinic <sup>s</sup><br>n = 73 | Hospitalization<br>n = 158 | p-Value |
|---------------------------|----------------|-------------------------------|----------------------------|---------|
| Age                       | 67.5 ± 14.5    | 60.7 ± 13.9                   | 70.7 ± 13.7                | <.001   |
| Sex (Female)              | 113 (48.9%)    | 42 (57.5%)                    | 71 (44.9%)                 | 0.075   |
| Etiology                  |                |                               |                            |         |
| Post infection (TB)       | 27 (11.7%)     | 9 (12.3%)                     | 18 (11.4%)                 | 0.837   |
| Post infection (other)    | 141 (61.0%)    | 35 (48.0%)                    | 106 (67.1%)                | 0.006   |
| Immunodeficiencies        | 6 (2.6%)       | 1 (1.4%)                      | 5 (3.2%)                   | 0.668   |
| Idiopathic                | 23 (10.0%)     | 15 (20.6%)                    | 8 (5.1%)                   | <.001   |
| Previous exacerbation*    | 1.1 ± 1.6      | 0.4 ± 1.2                     | 1.4 ± 1.7                  | <.001   |
| 0                         | 107 (46.3%)    | 57 (78.1%)                    | 50 (31.7%)                 | <.001   |
| 1                         | 66 (28.6%)     | 11 (15.1%)                    | 55 (34.8%)                 |         |
| 2                         | 36 (15.6%)     | 2 (2.7%)                      | 34 (21.5%)                 |         |
| ≥ 3                       | 22 (9.5%)      | 3 (4.1%)                      | 19 (12.0%)                 |         |
| BACI index                | 8.3 ± 6.2      | 6.8 ± 5.9                     | 8.9 ± 6.2                  | 0.015   |
| Comorbidity               |                |                               |                            |         |
| Solid malignancy          | 15 (6.5%)      | 2 (2.7%)                      | 13 (8.2%)                  | 0.154   |
| COPD                      | 125 (54.1%)    | 33 (45.2%)                    | 92 (58.2%)                 | 0.065   |
| Liver disease             | 59 (25.5%)     | 23 (31.5%)                    | 36 (22.8%)                 | 0.158   |
| Connective tissue disease | 13 (5.6%)      | 2 (2.7%)                      | 11 (7.0%)                  | 0.237   |
| Diabetes                  | 68 (29.4%)     | 20 (27.4%)                    | 48 (30.4%)                 | 0.644   |
| Chronic renal disease     | 44 (19.0%)     | 12 (16.4%)                    | 32 (20.3%)                 | 0.492   |
| Cardiovascular disease    | 71 (30.7%)     | 20 (27.4%)                    | 51 (32.3%)                 | 0.455   |
| Pulmonary function        |                |                               |                            | 0.636   |
| FEV <sub>1</sub> < 50     | 32 (13.9%)     | 9 (12.3%)                     | 23 (14.6%)                 |         |
| FEV <sub>1</sub> : 50_80  | 28 (12.1%)     | 11 (15.1%)                    | 17 (10.8%)                 |         |
| FEV <sub>1</sub> > 80     | 48 (20.8%)     | 20 (27.4%)                    | 28 (17.7%)                 |         |
| FVC: < 80 pred. %         | 38 (16.5%)     | 13 (17.8%)                    | 25 (15.8%)                 |         |
| Influenza test            |                |                               |                            | 0.557   |
| PCR                       | 14 (6.1%)      | 3 (4.1%)                      | 11 (7.0%)                  |         |
| Rapid antigen test        | 217 (93.9%)    | 70 (95.9%)                    | 147 (93.0%)                |         |
| Influenza medicine        |                |                               |                            | 0.362   |
| Amantadine                | 1 (0.4%)       | 1 (1.4%)                      | 0 (0.0%)                   |         |
| Zanamivir                 | 39 (16.9%)     | 11 (15.1%)                    | 28 (17.7%)                 |         |
| Oseltamivir               | 185 (80.1%)    | 58 (79.5%)                    | 127 (80.4%)                |         |
| Peramivir                 | 6 (2.6%)       | 3 (4.1%)                      | 3 (1.9%)                   |         |
| Medicine after 1 month    |                |                               |                            |         |
| Systemic Steroid          | 96 (41.6%)     | 10 (13.7%)                    | 86 (54.4%)                 | <.001   |

|            |             |          |             |       |
|------------|-------------|----------|-------------|-------|
| Antibiotic | 160 (69.3%) | 7 (9.6%) | 153 (96.8%) | <.001 |
|------------|-------------|----------|-------------|-------|

Note: BACI, bronchiectasis aetiology comorbidity index; COPD, chronic obstruction pulmonary disease; FEV<sub>1</sub>, forced expiratory volume in one second; FVC, forced vital capacity; pred.; predicted value; TB, tuberculosis.<sup>§</sup> The clinic group was defined as those with no episode of hospitalization. \* Previous exacerbation within one year

**Table S2.** Clinical characteristics of bronchiectasis and influenza-related (PCR or rapid antigen test) hospitalization.

|                           | All Ward<br>n = 158 | Non-Critical<br>n = 129 | Respiratory<br>Failure<br>n = 29 | p-Value |
|---------------------------|---------------------|-------------------------|----------------------------------|---------|
| Age                       | 70.7 ± 13.7         | 71.8 ± 12.7             | 65.7 ± 17.1                      | 0.082   |
| Sex (Female)              | 71 (44.9%)          | 58 (45.0%)              | 13 (44.8%)                       | 0.990   |
| Etiology                  |                     |                         |                                  |         |
| Post infection (TB)       | 18 (11.4%)          | 14 (10.9%)              | 4 (13.8%)                        | 0.746   |
| Post infection (other)    | 106 (67.1%)         | 91 (70.5%)              | 15 (51.7%)                       | 0.051   |
| Immunodeficiencies        | 5 (3.2%)            | 4 (3.1%)                | 1 (3.5%)                         | 1.000   |
| Idiopathic                | 8 (5.1%)            | 6 (4.7%)                | 2 (6.9%)                         | 0.640   |
| Previous exacerbation*    | 1.4 ± 1.7           | 1.3 ± 1.5               | 1.7 ± 2.4                        | 0.464   |
| 0                         | 50 (31.7%)          | 45 (34.9%)              | 5 (17.2%)                        | 0.027   |
| 1                         | 55 (34.8%)          | 38 (29.5%)              | 17 (58.6%)                       |         |
| 2                         | 34 (21.5%)          | 30 (23.3%)              | 4 (13.8%)                        |         |
| ≥ 3                       | 19 (12.0%)          | 16 (12.4%)              | 3 (10.3%)                        |         |
| BACI index                | 8.9 ± 6.2           | 8.9 ± 6.3               | 9.1 ± 6.0                        | 0.895   |
| Comorbidity               |                     |                         |                                  |         |
| Solid malignancy          | 13 (8.2%)           | 10 (7.8%)               | 3 (10.3%)                        | 0.708   |
| COPD                      | 92 (58.2%)          | 78 (60.5%)              | 14 (48.3%)                       | 0.229   |
| Liver disease             | 36 (22.8%)          | 27 (20.9%)              | 9 (31.0%)                        | 0.241   |
| Connective tissue disease | 11 (7.0%)           | 9 (7.0%)                | 2 (6.9%)                         | 1.000   |
| Diabetes                  | 48 (30.4%)          | 36 (27.9%)              | 12 (41.4%)                       | 0.154   |
| Chronic renal disease     | 32 (20.3%)          | 23 (17.8%)              | 9 (31.0%)                        | 0.110   |
| Cardiovascular disease    | 51 (32.3%)          | 42 (32.6%)              | 9 (31.0%)                        | 0.874   |
| Pulmonary function        |                     |                         |                                  | 0.643   |
| FEV <sub>1</sub> < 50     | 23 (14.6%)          | 18 (14.0%)              | 5 (17.2%)                        |         |
| FEV <sub>1</sub> : 50_80  | 17 (10.8%)          | 13 (10.1%)              | 4 (13.8%)                        |         |
| FEV <sub>1</sub> > 80     | 28 (17.7%)          | 25 (19.4%)              | 3 (10.3%)                        |         |
| FVC: < 80 pred. %         | 25 (15.8%)          | 21 (16.3%)              | 4 (13.8%)                        |         |
| Influenza test            |                     |                         |                                  | 0.119   |
| PCR                       | 11 (7.0%)           | 7 (5.4%)                | 4 (13.8%)                        |         |
| Rapid antigen test        | 147 (93.0%)         | 122 (94.6%)             | 25 (86.2%)                       |         |
| Influenza medicine        |                     |                         |                                  | 0.607   |
| Amantadine                | 0 (0.0%)            | 0 (0.0%)                | 0 (0.0%)                         |         |
| Zanamivir                 | 28 (17.7%)          | 24 (18.6%)              | 4 (13.8%)                        |         |
| Oseltamivir               | 127 (80.4%)         | 103(79.8%)              | 24 (82.8%)                       |         |
| Peramivir                 | 3 (1.9%)            | 2 (1.6%)                | 1 (3.4%)                         |         |

Note: BACI, bronchiectasis aetiology comorbidity index; COPD, chronic obstruction pulmonary disease; FEV<sub>1</sub>, forced expiratory volume in one second; FVC, forced vital capacity; pred., predicted value; PCR, polymerase chain reaction; TB, tuberculosis. \* Previous exacerbation within one year.

**Table S3.** Clinical parameters and main clinical outcomes of influenza-related (PCR or rapid antigen test) hospitalization.

|                                 | All Ward<br>n = 158 | Non-Critical<br>n = 129 | Respiratory Failure<br>n = 29 | p-Value |
|---------------------------------|---------------------|-------------------------|-------------------------------|---------|
| Sputum culture in ward          | 110 (69.6%)         | 85 (65.9%)              | 25 (86.2%)                    | 0.032   |
| Negative                        | 75 (68.2%)          | 63 (74.1%)              | 12 (48.0%)                    | 0.014   |
| <i>Pseudomonas aeruginosa</i>   | 13 (11.8%)          | 10 (11.8%)              | 3 (12.0%)                     | 1.000   |
| <i>Klebsiella pneumoniae</i>    | 5 (4.6%)            | 4 (4.7%)                | 1 (4.0%)                      | 1.000   |
| <i>Haemophilus influenzae</i>   | 5 (4.6%)            | 3 (3.5%)                | 2 (8.0%)                      | 0.318   |
| Fungus                          | 8 (7.3%)            | 3 (3.5%)                | 5 (20.0%)                     | 0.015*  |
| NTM                             | 2 (1.8%)            | 1 (1.2%)                | 1 (4.0%)                      | 0.405   |
| <i>Staphylococcus aureus</i>    | 2 (1.8%)            | 0 (0.0%)                | 2 (8.0%)                      | 0.050   |
| MDR-AB                          | 4 (3.6%)            | 2 (2.4%)                | 2 (8.0%)                      | 0.222   |
| Lab Data                        |                     |                         |                               |         |
| WBC (×10 <sup>3</sup> /ul)      | 9.7 ± 4.3           | 9.4 ± 3.9               | 11.2 ± 5.7                    | 0.111   |
| Platelet (×10 <sup>3</sup> /ul) | 191.9 ± 69.6        | 193.2 ± 65.7            | 186.2 ± 86.2                  | 0.683   |
| C-reactive protein (mg/L)       | 81.7 ± 95.5         | 62.8 ± 67.9             | 139.9 ± 138                   | 0.008   |
| Creatinine , baseline (mg/dL)   | 1.4 ± 1.7           | 1.3 ± 1.8               | 1.6 ± 1.7                     | 0.360   |
| Creatinine , ward (mg/dL)       | 1.5 ± 2.0           | 1.3 ± 1.8               | 2.2 ± 2.3                     | 0.031   |
| Acute kidney injury             | 35 (22.2%)          | 23 (17.8%)              | 12 (41.4%)                    | 0.006   |
| Influenza medicine              |                     |                         |                               | 0.607   |
| Amantadine                      | 0 (0.0%)            | 0 (0.0%)                | 0 (0.0%)                      |         |
| Zanamivir                       | 28 (17.7%)          | 24 (18.6%)              | 4 (13.8%)                     |         |
| Oseltamivir                     | 127 (80.4%)         | 103 (79.8%)             | 24 (82.8%)                    |         |
| Peramivir                       | 3 (1.9%)            | 2 (1.6%)                | 1 (3.5%)                      |         |
| Other medication                |                     |                         |                               |         |
| Systemic Steroid                | 86 (54.4%)          | 65 (50.4%)              | 21 (72.4%)                    | 0.031   |
| Antibiotic                      | 153 (96.8%)         | 125 (96.9%)             | 28 (96.6%)                    | 1.000   |
| Inhalation gentamicin           | 4 (2.5%)            | 1 (0.8%)                | 3 (10.3%)                     | 0.02*   |
| Days of hospitalization         | 12.5 ± 12.5         | 9.7 ± 9.8               | 25.1 ± 15.4                   | <.001   |
| Shock                           | 19 (12.0%)          | 5 (3.9%)                | 14 (48.3%)                    | <.001*  |
| In-hospital mortality           | 12 (7.6%)           | 6 (4.7%)                | 6 (20.7%)                     | 0.010*  |
| 30-day mortality                | 10 (6.3%)           | 5 (3.9%)                | 5 (17.2%)                     | 0.019*  |
| 3-month mortality               | 13 (8.2%)           | 6 (4.7%)                | 7 (24.1%)                     | 0.003*  |
| One-year outcomes               |                     |                         |                               |         |
| Mortality                       | 11 (7.53%)          | 7 (5.69%)               | 4 (17.39%)                    | 0.073   |
| Respiratory failure             | 12 (7.53%)          | 8 (5.69%)               | 5 (17.39%)                    | 0.012*  |
| Severe exacerbations            | 13 (7.53%)          | 9 (5.69%)               | 6 (17.39%)                    | 0.009   |
| Mild and severe exacerbations   | 1.84 ± 2.83         | 1.71 ± 2.81             | 2.57 ± 2.87                   | 0.183   |

Note: MDR-AB, multidrug-resistant *Acinetobacter baumannii*; NTM, non-tuberculosis mycobacteria; WBC, white blood cell count.

**Table S4.** The Harrell's C-index of the significant parameters in Table 4 and Table 5.

| <b>Table 4 Parameters</b>        | <b>Harrell's C-Index</b> | <b>Table 5 Parameters</b> | <b>Harrell's C-Index</b> |
|----------------------------------|--------------------------|---------------------------|--------------------------|
| Age                              | 0.61                     | Age                       | 0.62                     |
| Female                           | 0.53                     | Female                    | 0.57                     |
| Etiology                         |                          | Etiology                  |                          |
| Post infection                   | 0.58                     | Tuberculosis              | 0.54                     |
| Idiopathic                       | 0.56                     | Cardiovascular disease    | 0.54                     |
| Previous exacerbations*          | 0.7                      | Platelet count            | 0.58                     |
| 0                                |                          | Acute kidney injury       | 0.68                     |
| 1                                |                          | Systemic steroid          | 0.52                     |
| 2                                |                          | Respiratory failure       | 0.57                     |
| ≥ 3                              |                          | Shock                     | 0.75                     |
| BACI index                       | 0.62                     |                           |                          |
| Pulmonary function               | 0.58                     |                           |                          |
| FEV <sub>1</sub> : < 50 pred. %  |                          |                           |                          |
| FEV <sub>1</sub> : 50-80 pred. % |                          |                           |                          |
| FEV <sub>1</sub> : > 80 pred. %  |                          |                           |                          |
| FVC: <80 pred. %                 |                          |                           |                          |

Note: BACI, bronchiectasis aetiology comorbidity index; FEV<sub>1</sub>, forced expiratory volume in one second, FVC, forced vital capacity. \* Previous exacerbation within one year.
